# Supplementary material
Source: HighWire-hosted journal article supplement (https://erj.ersjournals.com/content/51/5/1701610)
Supplement: inline-supplementary-material-1 [file inline-supplementary-material-1.pdf]

## **ONLINE DATA SUPPLEMENT**

### **Aminopeptidase N/CD13 as a Potential Therapeutic Target in Malignant Pleural**

#### **Mesothelioma**

Takahiko Otsuki, Taku Nakashima, Hironobu Hamada, Yusuke Takayama, Shin Akita, Takeshi Masuda, Yasushi Horimasu, Shintaro Miyamoto, Hiroshi Iwamoto, Kazunori Fujitaka, Yoshihiro Miyata, Masayuki Miyake, Nobuoki Kohno, Morihito Okada and Noboru Hattori

## **SUPPLEMENTAL METHODS**

### **Angiogenesis Antibody Array Analysis**

EHMES-10 ( $2.5 \times 10^5$ ) cells were seeded in 6-well plates and incubated with MT95-4 (40  $\mu\text{g/mL}$ ) or human control IgG for 24 hours. Cells were rinsed with phosphate-buffered saline and dissolved in lysis buffer (NP-40), and the protein concentration in the cell lysates was determined and normalized using a BCA assay kit (Pierce Biotechnology, Rockford, IL, USA) to ensure that the same amount of total protein was used for each assay. Human angiogenesis antibody array analysis (R&D Systems, Minneapolis, MN, USA) was performed according to the manufacturer's instructions. Briefly, the samples were placed on the membrane and incubated at 4°C overnight, followed by incubation with a biotinylated detection antibody for 2 hours at room temperature. Horseradish peroxidase-streptavidin solution was added to the membrane and incubated for 2 hours at room temperature. The densities of individual spots were visualized using a chemiluminescence detection system (WSE-6100; ATTO, Tokyo, Japan) and measured using ImageSaver6 (ATTO).

**Table S1, related to Figure 6****Array map of Angiogenesis Antibody Array Analysis****Array 1**

|   | A                   | B                   | C                   | D                   | E                | F      | G                     | H                   |
|---|---------------------|---------------------|---------------------|---------------------|------------------|--------|-----------------------|---------------------|
| 1 | Positive<br>Control | Positive<br>Control | Negative<br>Control | Negative<br>Control | Angiogenin       | EGF    | ENA-78<br>(CXCL5)     | bFGF                |
| 2 |                     |                     |                     |                     |                  |        |                       |                     |
| 3 | Growth<br>Factor    | IFN- $\gamma$       | IGF-1               | IL-6                | IL-8<br>(CXCL-8) | Leptin | MCP-1<br>(CCL2)       | PDGF-BB             |
| 4 |                     |                     |                     |                     |                  |        |                       |                     |
| 5 | PLGF                | RANTES<br>(CCL5)    | TGF- $\beta$ 1      | TIMP-1              | TIMP-2           | TPO    | VEGF-A                | VEGF-D              |
| 6 |                     |                     |                     |                     |                  |        |                       |                     |
| 7 | BLANK               | BLANK               | BLANK               | BLANK               | BLANK            | BLANK  | Negative<br>Control 1 | Positive<br>Control |
| 8 |                     |                     |                     |                     |                  |        |                       |                     |

**Array 2**

|   | A                   | B                   | C                   | D                   | E             | F                 | G           | H                   |
|---|---------------------|---------------------|---------------------|---------------------|---------------|-------------------|-------------|---------------------|
| 1 | Positive<br>Control | Positive<br>Control | Negative<br>Control | Negative<br>Control | ANGPT1        | ANGPT2            | Angiostatin | Endostatin          |
| 2 |                     |                     |                     |                     |               |                   |             |                     |
| 3 | GCSF                | GM-CSF              | I-309<br>(CCL1)     | IL-10               | IL-1 $\alpha$ | IL-1 $\beta$      | IL-2        | IL-4                |
| 4 |                     |                     |                     |                     |               |                   |             |                     |
| 5 | I-TAC<br>(CXCL11)   | MCP-3<br>(CCL7)     | MCP-4<br>(CCL13)    | MMP-1               | MMP-9         | PECAM-1<br>(CD31) | Tie-2       | TNF $\alpha$        |
| 6 |                     |                     |                     |                     |               |                   |             |                     |
| 7 | uPAR                | VEGF R2             | VEGF R3             | BLANK               | BLANK         | BLANK             | BLANK       | Positive<br>Control |
| 8 |                     |                     |                     |                     |               |                   |             |                     |
